# Supplementary material for: Variety and Dynamics of Proteoforms in the Human Proteome: Aspects of Markers for Hepatocellular Carcinoma
Source: Proteomes. 2017 Nov 23;5(4):33. doi: 10.3390/proteomes5040033 (PMC5748568; doi:10.3390/proteomes5040033)
Supplement: Supplementary file 1 [file proteomes-05-00033-s001.xlsx]

## Sheet:  Detected in HepG2 only
Protein	Gene	UniProt	Protein name	Ratio (hepatocyte /HepG2) Wisniewski et al [14]
4F2	SLC3A2	P08195	4F2 cell-surface antigen heavy chain	0.0152057
6PGD	PGD	P52209	6-phosphogluconate dehydrogenase, decarboxylating	0.597944
ACOC	ACO1	P21399	Cytoplasmic aconitate hydratase	8.85172
ACPH	APEH	C9JIF9	Acylamino-acid-releasing enzyme	1.68227
ACSL3	ACSL3	O95573	Long-chain-fatty-acid--CoA ligase 3	0.0680161
ACSL4	ACSL4	O60488	Long-chain-fatty-acid--CoA ligase 4	0.0187134
ADT3	SLC25A6	P12236	ADP/ATP translocase 3	0.186426
AGFG1	AGFG1	P52594	Arf-GAP domain and FG repeat-containing protein 1	0.335879
AIFM2	AIFM2	Q9BRQ8	Apoptosis-inducing factor 2	0.0219531
AKAP8	AKAP8	O43823	A-kinase anchor protein 8	0.110553
AN32B	ANP32B	Q92688	Acidic leucine-rich nuclear phosphoprotein 32 family member B	0.290094
AN32E	ANP32E	Q9BTT0	Acidic leucine-rich nuclear phosphoprotein 32 family member E	0.212062
AP3B1	AP3B1	O00203	AP-3 complex subunit beta-1	0.16846
API5	API5	Q9BZZ5	Apoptosis inhibitor 5	0.210834
ARFG1	ARFGAP1	Q8N6T3	ADP-ribosylation factor GTPase-activating protein 1	0.0393323
ARGI2	ARG2	P78540	Arginase-2, mitochondrial	N/A
ARI3A	ARID3A	Q99856	AT-rich interactive domain-containing protein 3A	N/A
ARRB1	ARRB1	P49407	Beta-arrestin-1	0.193259
ASGL1	ASRGL1	Q7L266	Isoaspartyl peptidase/L-asparaginase	N/A
ASPC1	ASPSCR1	Q9BZE9	Tether containing UBX domain for GLUT4	0.133073
ATP5J	ATP5J	P18859	ATP synthase-coupling factor 6, mitochondrial	1.0501
ATX10	ATXN10	Q9UBB4	Ataxin-10	0.0708412
ATX2L	ATXN2L	Q8WWM7	Ataxin-2-like protein	0.08049
BABA1	BABAM1	Q9NWV8	BRISC and BRCA1-A complex member 1	0.624453
BACH	ACOT7	O00154	Cytosolic acylcoenzyme A thioesterhydrolase	0.161186
BAF	BANF1	O75531	Barrier-to-autointegration factor	0.303765
BAG6	BAG6	P46379	Large proline-rich protein BAG6	0.190352
BCAM	BCAM	P50895	Basal cell adhesion molecule	0.0188274
BCCIP	BCCIP	Q9P287	BRCA2 and CDKN1A-interacting protein	0.0896353
BCLF1	BCLAF1	Q9NYF8	Bcl-2-associated transcription factor 1	0.0779244
BGAL	GLB1	P16278	Beta-galactosidase	0.676524
C1TM	MTHFD1L	Q6UB35	Monofunctional C1-tetrahydrofolate synthase, mitochondrial	N/A
CAN1	CAPN1	P07384	Calpain-1 catalytic subunit	2.27778
CAPR1	CAPRIN1	Q14444	Caprin-1	0.321277
CATC	CTSC	P53634	Dipeptidyl peptidase 1	0.168026
CCAR2	CCAR2	Q8N163	Cell cycle and apoptosis regulator protein 2	0.0996117
CCNK	CCNK	O75909	Cyclin-K	0.0470277
CDK1	CDK1	P06493	Cyclin-dependent kinase 1	N/A
CEBPZ	CEBPZ	Q03701	CCAAT/enhancer-binding protein zeta	0.0576841
CHD4	CHD4	Q14839	Chromodomain-helicase-DNA-binding protein 4	0.110965
CHM4A	CHMP4A	Q9BY43	Charged multivesicular body protein 4a	0.24687
CLPX	CLPX	O76031	ATP-dependent Clp protease ATP-binding subunit clp X-like, mitochondrial	0.490289
COX20	COX20	Q5RI15	Cytochrome coxidase protein 20 homolog	0.390443
CSN7B	COPS7B	Q9H9Q2	COP9 signalosome complex subunit 7b	0.287442
CUTA	CUTA	O60888	Protein CutA	0.491273
CYC	CYCS	P99999	Cytochrome c	1.20325
DCTP1	DCTPP1	Q9H773	dCTP pyrophosphatase 1	0.0166828
DDB1	DDB1	Q16531	DNA damage-binding protein 1	0.405239
DDB2	DDB2	Q92466	DNA damage-binding protein 2	0.0566485
DDX18	DDX18	Q9NVP1	ATP-dependent RNA helicase DDX18	0.0596553
DDX21	DDX21	Q9NR30	Nucleolar RNA helicase 2	0.019484
DDX23	DDX23	Q9BUQ8	Probable ATP-dependent RNA helicase DDX23	0.173412
DDX42	DDX42	Q86XP3	ATP-dependent RNA helicase DDX42	0.136303
DDX46	DDX46	Q7L014	Probable ATP-dependent RNA helicase DDX46	0.131678
DDX6	DDX6	P26196	Probable ATP-dependent RNA helicase DDX6	0.37463
DEK	DEK	P35659	Protein DEK	0.0736653
DHX15	DHX15	O43143	Putativepre-mRNA-splicing factor ATP-dependent RNA helicase DHX15	0.127494
DPP3	DPP3	Q9NY33	Dipeptidyl peptidase 3	0.72145
DPP4	DPP4	P27487	Dipeptidyl peptidase 4	0.0841776
DPYL4	DPYSL4	O14531	Dihydropyrimidinase-related protein 4	N/A
DSRAD	ADAR	P55265	Double-stranded RNA-specific adenosine deaminase	0.360437
DUS9	DUSP9	Q99956	Dual-specificity protein phosphatase 9	N/A
DUT	DUT	P33316-2	Isoform 2 of Deoxyuridine 5'-triphosphate nucleotidohydrolase, mitochondrial	0.0984906
DYL1	DYNLL1	P63167	Dynein light chain 1, cytoplasmic	0.208646
E41L2	EPB41L2	O43491	Band4.1-likeprotein2	0.0227275
EIF3C	EIF3C	Q99613	Eukaryotic translation initiation factor3 subunit C	0.391563
EIF3J	EIF3J	O75822	Eukaryotic translation initiation factor 3 subunit J	0.320947
EIF3L	EIF3L	Q9Y262	Eukaryotic translation initiation factor 3 subunit L	0.52456
ELP1	IKBKAP	O95163	Elongator complex protein 1	0.0928163
EMC1	EMC1	Q8N766	ER membrane protein complex subunit 1	0.201206
ENOPH	ENOPH1	Q9UHY7	Enolase-phosphatase E1	0.349602
ENPP1	ENPP1	P22413	Ectonucleotide pyrophosphatase/phosphodiesterase family member 1	1.17061
ERF3A	ERF3A	P15170	EukaryoticpeptidechainreleasefactorGTP-bindingsubunitERF3A	0.1577
ERH	ERH	P84090	Enhancer of rudimentary homolog	0.154093
EWS	EWSR1	Q01844	RNA-bindingproteinEWS	0.479729
F136A	FAM136A	Q96C01	ProteinFAM136A	0.157914
FA98A	FAM98A	Q8NCA5	Protein FAM98A	0.51804
FA98B	FAM98B	Q52LJ0-2	Isoform2ofProteinFAM98B	0.284032
FABP5	FABP5	Q01469	Fatty acid-binding protein, epidermal	0.030443
FAH2B	FAHD2B	Q6P2I3	Fumarylacetoacetatehydrolasedomain-containingprotein2B	N/A
FBRL	FBL	P22087	rRNA2'-O-methyltransferasefibrillarin	0.0956223
FBX2	FBXO2	Q9UK22	F-boxonlyprotein2	0.0206958
FEN1	FEN1	P39748	Flap endonuclease 1	0.0334565
FETA	AFP	P02771-1	Alpha-fetoprotein isoform Iso 1	N/A
GCN1L	GCN1L1	Q92616	TranslationalactivatorGCN1	0.366427
GCSH	GCSH	P23434	Glycine cleavage system H protein, mitochondrial	1.0272
GDIA	GDI1	P31150	RabGDP dissociation inhibitor alpha	2.83193
GLPK3	GK3P	Q14409	Putative glycerol kinase 3	0.180272
GNL3	GNL3	Q9BVP2	Guanine nucleotide-binding protein-like 3	0.0242441
GPC3	GPC3	P51654	Glypican-3	N/A
GSLG1	GLG1	Q92896	Golgi apparatus protein 1	0.0478412
GTF2I	GTF2I	P78347	General transcription factor II-I	0.0944875
H10	H1F0	P07305	HistoneH1.0	0.351349
H14	HIST1H1E	P10412	HistoneH1.4	0.212482
H2A1	HIST1H2AG	P0C0S8	Histone H2A type 1	0.235453
H2AFY2	H2AFY2	Q9P0M6	Core histone macro-H2A.2	0.25055
HAP28	PDAP1	Q13442	28 kDa heat- and acid-stable phosphoprotein	0.801673
HCFC1	HCFC1	P51610	HCFN-terminalchain5	0.128973
HDAC2	HDAC2	Q92769	Histone deacetylase 2	0.0839612
HDGR2	HDGFRP2	Q7Z4V5-3	Isoform 3 of Hepatoma-derived growth factor-related protein 2	0.505993
HMGB2	HMGB2	P26583	High mobility group protein B2	0.070277
HMGB3	HMGB3	O15347	High mobility group protein B3	0.218161
HNRL1	HNRNPUL1	Q9BUJ2	Heterogeneous nuclear ribonucleoprotein U-like protein 1	0.069226
HNRL2	HNRNPUL2	Q1KMD3	Heterogeneous nuclear ribonucleoprotein U-like protein 2	0.20421
HS105	HSPH1	Q92598	Heat shock protein 105 kDa	0.423382
HSP74	HSPA4	P34932	Heat shock 70kDa protein 4	0.453446
HXK2	HK2	P52789	Hexokinase-2	N/A
IBP1	IGFBP1	P08833	Insulin-likegrowthfactor-bindingprotein1	0.247005
ICAL	CAST	P20810	Calpastatin	2.20977
ICAM1	ICAM1	P05362	Intercellular adhesion molecule 1	0.0124417
IF2B2	EIF2B2	P49770	Translation initiation factore IF-2B subunit beta	0.397926
IF2B3	IGF2BP3	O00425	Insulin-like growth factor 2 mRNA-binding protein 3	N/A
IF2G	EIF2S3	P41091	Eukaryotictranslationinitiationfactor2subunit3	0.300806
IGSF1	IGSF1	Q8N6C5	Immunoglobulinsuperfamilymember1	N/A
IMA1	KPNA2	P52292	Importin subunit alpha-1	0.00201424
IMA4	KPNA3	O00505	Importin subunit alpha-4	0.323931
IPO4	IPO4	Q8TEX9	Importin-4	0.0373851
IPO5	IPO5	O00410	Importin-5	0.133908
IPO7	IPO7	O95373	Importin-7	0.257064
IST1	IST1	P53990	IST1 homolog	0.255962
ITA2	ITGA2	P17301	Integrin alpha-2	N/A
ITPA	ITPA	Q9BY32	Inosinetriphosphatepyrophosphatase	0.490937
IWS1	IWS1	Q96ST2	Protein IWS1 homolog	0.0676425
KS6A3	RPS6KA3	P51812	Ribosomal protein S6 kinase alpha-3	0.0474002
KTN1	KTN1	Q86UP2	Kinectin	0.286041
LAGE3	LAGE3	Q14657	EKC/KEOPScomplexsubunitLAGE3	8.83039
LAMB1	LAMB1	P07942	Laminin subunit beta-1	0.00249154
LAP2A	TMPO	P42166	Lamina-associated polypeptide2, isoform alpha	0.107508
LC7L2	LUC7L2	Q9Y383	Putative RNA-binding protein Luc7-like 2	0.422988
LSM3	LSM3	P62310	U6snRNA-associatedSm-likeproteinLSm3	0.128134
MA2A1	MAN2A1	Q16706	Alpha-mannosidase2	0.340856
MBB1A	MYBBP1A	Q9BQG0	Myb-bindingprotein1A	0.0532071
MCM2	MCM2	P49736	DNA replication licensing factor MCM2	0.0383102
MCM3	MCM3	P25205	DNA replication licensing factor MCM3	0.0101739
MCM5	MCM5	P33992	DNA replication licensing factor MCM5	0.0292736
MCM6	MCM6	Q14566	DNA replication licensing factor MCM6	0.0333642
MCM7	MCM7	P33993	DNA replication licensing factor MCM7	0.0367449
MIP18	FAM96B	Q9Y3D0	Mitoticspindle-associatedMMXDcomplexsubunitMIP18	0.147718
MK01	MAPK1	P28482	Mitogen-activated protein kinase 1	0.089113
MOT4	SLC16A3	O15427	Monocarboxylatetransporter4	N/A
MPRI	IGF2R	P11717	Cation-independent mannose-6-phosphate receptor	0.0878085
MRT4	MRTO4	Q9UKD2	mRNA turnover protein 4 homolog	0.0557869
MSH2	MSH2	P43246	DNA mismatch repair protein Msh2	0.111908
MSH6	MSH6	P52701	DNA mismatch repair protein Msh6	0.0607565
NAA15	NAA15	Q9BXJ9	N-alpha-acetyltransferase15,NatAauxiliarysubunit	0.291654
NACP1	NACAP1	Q9BZK3	Putative nascent polypeptide-associated complex subunit alpha-like protein	0.474987
NAP1L4	NAP1L4	Q99733	Nucleosome assembly protein1-like 4	0.168093
NDUAC	NDUFA12	Q9UI09	NADHdehydrogenase[ubiquinone]1alphasubcomplexsubunit12	0.710201
NDUB6	NDUFB6	O95139	NADHdehydrogenase[ubiquinone]1betasubcomplexsubunit6	0.744598
NEUR1	NEU1	Q99519	Sialidase-1	0.0347032
NGDN	NGDN	Q8NEJ9	Neuroguidin	0.0177795
NHRF1	SLC9A3R1	O14745	Na(+)/H(+)exchangeregulatorycofactorNHE-RF1	0.352753
NIPS2	GBAS	O75323	Protein NipSnap homolog 2	0.0225982
NOP58	NOP58	Q9Y2X3	Nucleolar protein 58	0.140514
NPC2	NPC2	P61916	Epididymal secretory protein E1	0.265273
NPL4	NPLOC4	Q8TAT6	Nuclear protein localization protein 4 homolog	0.220632
NPM3	NPM3	O75607	Nucleoplasmin-3	N/A
NQO1	NQO1	P15559	NAD(P)H dehydrogenase [quinone] 1	0.000715317
NTF2	NUTF2	P61970	Nuclear transport factor 2	0.519703
NU155	NUP155	O75694	Nuclear pore complex protein Nup155	0.0955954
NUCB1	NUCB1	Q02818	Nucleobindin-1	0.931043
NUP85	NUP85	Q9BW27	Nuclear pore complex protein Nup85	0.0942449
NUP93	NUP93	Q8N1F7	Nuclear pore complex protein Nup93	0.0989443
NXP20	FAM114A1	Q8IWE2	Protein NOXP20	1.5157
OGFR	OGFR	Q9NZT2	Opioid growth factor receptor	0.358868
ORN	REXO2	Q9Y3B8	Oligoribonuclease,mitochondrial	0.26651
PAK2	PAK2	Q13177	Serine/threonine-proteinkinase PAK2	0.453013
PDCD5	PDCD5	O14737	Programmed cell death protein 5	0.525084
PDCD6	PDCD6	O75340	Programmed cell death protein 6	1.17836
PEG10	PEG10	Q86TG7	Retrotransposon-derivedproteinPEG10	N/A
PEG3	PEG3	Q9GZU2	Paternally-expressed gene 3 protein	N/A
PELP1	PELP1	Q8IZL8	Proline-,glutamicacid-andleucine-richprotein1	0.0206527
PESC	PES1	O00541	Pescadillohomolog	0.0699096
PEX14	PEX14	O75381	Peroxisomal membrane protein PEX14	0.914249
PGP	PGP	A6NDG6	Phosphoglycolatephosphatase	0.0778529
PLOD1	PLOD1	Q02809	Procollagen-lysine,2-oxoglutarate5-dioxygenase1	0.0605435
PLRG1	PLRG1	O43660	Pleiotropicregulator1	0.126562
PO210	NUP210	Q8TEM1	Nuclear pore membrane glycoprotein 210	0.32142
PPM1G	PPM1G	O15355	Protein phosphatase 1G	0.0978821
PREB	PREB	Q9HCU5	Prolactin regulatory element-binding protein	0.24871
PRKDC	PRKDC	P78527	DNA-dependent protein kinase catalytic subunit	0.10629
PRP6	PRPF6	O94906	Pre-mRNA-processing factor 6	0.10431
PRP8	PRPF8	Q6P2Q9	Pre-mRNA-processing-splicing factor 8	0.128274
PRPS2	PRPS2	P11908	Ribose-phosphatepyrophosphokinase2	0.861646
PSA	NPEPPS	P55786	Puromycin-sensitive aminopeptidase	0.162913
PSA7L	PSMA8	Q8TAA3	Proteasome subunit alpha type-7-like	0.732079
PSMD3	PSMD3	O43242	26S proteasome non-ATPase regulatory subunit 3	0.793268
PTPRK	PTPRK	Q15262	Receptor-typetyrosine-proteinphosphatase kappa	N/A
PUR1	PPAT	Q06203	Amidophosphoribosyl transferase	0.167277
PUR4	PFAS	O15067	Phosphoribosylformylglycinamidinesynthase	0.354784
PYGM	PYGM	P11217	Glycogen phosphorylase,muscle form	N/A
PYR1	CAD	P27708	CAD protein	0.116986
QORX	TP53I3	Q53FA7	QuinoneoxidoreductasePIG3	0.040866
RAB1A	RAB1A	P62820	Ras-relatedproteinRab-1A	0.336628
RAD50	RAD50	Q92878	DNA repair protein RAD50	0.393254
RADI	RDX	P35241	Radixin	2.2376
RAGP1	RANGAP1	P46060	Ran GTPase-activating protein 1	0.114956
RANB3	RANBP3	Q9H6Z4	Ran-binding protein 3	0.168371
RBM12	RBM12	Q9NTZ6	RNA-binding protein 12	0.172452
RBM25	RBM25	P49756	RNA-binding protein 25	0.189562
RBM39	RBM39	Q14498	RNA-binding protein 39	0.0800271
RCC2	RCC2	Q9P258	Protein RCC2	0.0337609
RCN2	RCN2	Q14257	Reticulocalbin-2	0.0182035
RHG18	ARHGAP18	Q8N392	Rho GTPase-activating protein 18	0.00477332
RHOG	RHOG	P84095	Rho-relatedGTP-bindingproteinRhoG	0.41265
RIR1	RRM1	P23921	Ribonucleoside-diphosphate reductase large subunit	0.0166626
RL1D1	RSL1D1	O76021	Ribosomal L1 domain-containing protein 1	0.0340829
RM09	MRPL9	Q9BYD2	39S ribosomal protein L9, mitochondrial	0.0574625
RM12	MRPL12	P52815	39S ribosomal protein L12, mitochondrial	0.211562
RM22	MRPL22	Q9NWU5	39S ribosomal protein L22, mitochondrial	0.0762073
RRP5	PDCD11	Q14690	Protein RRP5 homolog	0.062881
RS24	RPS24	P62847	40S ribosomal protein S24	0.376545
RS28	RPS28	P62857	40S ribosomal protein S28	0.706977
RS30	FAU	P62861	40S ribosomal protein S30	0.379712
RT07	MRPS7	Q9Y2R9	28S ribosomal protein S7, mitochondrial	0.128328
RT18A	MRPS18A	Q9NVS2	28S ribosomal protein S18a, mitochondrial	0.0472739
RT29	DAP3	P51398	28S ribosomal protein S29, mitochondrial	0.0761523
RU17	SNRNP70	P08621	U1 small nuclear ribonucleoprotein 70kDa	0.249077
RU1C	SNRPC	P09234	U1smallnuclearribonucleoproteinC	0.295316
RUXE	SNRPE	P62304	SmallnuclearribonucleoproteinE	0.377564
S10A1	S100A1	P23297	Protein S100	N/A
SAE2	UBA2	Q9UBT2	SUMO-activating enzyme subunit 2	0.164819
SAFB1	SAFB	Q15424	Scaffold attachment factor B1	N/A
SAFB2	SAFB2	Q14151	Scaffold attachment factor B2	0.0588951
SART3	SART3	Q15020	Squamous cell carcinoma antigen recognized byT-cells 3	0.127929
SC16A	SEC16A	O15027	Protein transport protein Sec16A	0.750863
SCAM2	SCAMP2	O15127	Secretorycarrier-associatedmembraneprotein2	0.0365423
SCRN1	SCRN1	Q12765	Secernin-1	N/A
SDA1	SDAD1	Q9NVU7	Protein SDA1 homolog	0.0288707
SERB	PSPH	P78330	Phosphoserinephosphatase	0.0540568
SET	SET	Q01105-2	Isoform 2 of Protein SET	0.429867
SETLP	SETSIP	P0DME0	ProteinSETSIP	N/A
SF01	SF1	Q15637	Splicing factor 1	0.18945
SF3A1	SF3A1	Q15459	Splicing factor 3A subunit 1	0.126191
SF3B2	SF3B2	Q13435	Splicing factor 3B subunit 2	0.121201
SF3B3	SF3B3	Q15393-3	Isoform 3 of Splicing factor 3B subunit 3	0.154378
SF3B6	SF3B6	Q9Y3B4	Splicing factor 3B subunit 6	0.138202
SKP1	SKP1	P63208	S-phase kinase-associated protein 1	0.316537
SMHD1	SMCHD1	A6NHR9	Structural maintenance of chromosomes flexible hinge domain-containing protein 1	0.0282188
SORT	SORT1	Q99523	Sortilin	0.00485376
SP16H	SUPT16H	Q9Y5B9	FACT complex subunit SPT16	0.0518729
SPEE	SRM	P19623	Spermidinesynthase	0.106386
SPS2L	SPATS2L	Q9NUQ6	DNA polymerase-transactivated protein6, isoformCRA_b	0.282075
SPTC1	SPTLC1	O15269	Serine palmitoyltransferase 1	0.0377759
SR140	U2SURP	O15042	U2snRNP-associatedSURPmotif-containingprotein	0.061935
SRC	SRC	P12931	Proto-oncogene tyrosine-protein kinase Src	N/A
SRPK1	SRPK1	Q96SB4	SRSF proteinkinase 1	0.0943618
SRRT	SRRT	Q9BXP5	SerrateRNAeffectormoleculehomolog	0.149103
SRS11	SRSF11	Q05519	Serine/arginine-rich-splicing factor 11	0.0525231
SRSF2	SRSF2	Q01130	Serine/arginine-rich-splicingfactor2	0.19778
SRSF4	SRSF4	Q08170	Serine/arginine-richsplicingfactor4	0.267919
SSRP1	SSRP1	Q08945	FACTcomplexsubunitSSRP1	0.0771016
STAU1	STAU1	O95793	Double-strandedRNA-bindingproteinStaufenhomolog1	0.216914
STMN1	STMN1	P16949	Stathmin	0.0134559
STRN3	STRN3	Q13033-2	IsoformAlphaofStriatin-3	0.157592
STX7	STX7	O15400	Syntaxin-7	0.148086
SYAP1	SYAP1	Q96A49	Synapse-associatedprotein1	0.760473
SYWC	WARS	P23381	T1-TrpRS	0.26379
TBA8	TUBA8	Q9NY65	Tubulin alpha-8 chain	N/A
TBCB	TBCB	Q99426	Tubulin-folding cofactor B	0.39549
TBL3	TBL3	Q12788	Transducinbeta-likeprotein3	0.0232648
TCRG1	TCERG1	O14776	Transcriptionelongationregulator1	0.12024
TFB1M	TFB1M	Q8WVM0	Dimethyladenosinetransferase1,mitochondrial	0.0392726
THUM1	THUMPD1	Q9NXG2	THUMP domain-containing protein 1	0.590186
TIF1B	TRIM28	Q13263	Transcription intermediary factor1-beta	0.10565
TM9S4	TM9SF4	Q92544	Transmembrane 9 superfamily member 4	0.0577287
TOP1	TOP1	P11387	DNA topoisomerase 1	0.049365
TPR	TPR	P12270	Nucleoprotein TPR	0.136737
TR150	THRAP3	Q9Y2W1	Thyroidhormonereceptor-associatedprotein3	0.175571
TRM1	TRMT1	Q9NXH9	tRNA(guanine(26)-N(2))-dimethyltransferase	0.076224
TRM61	TRMT61A	Q96FX7	tRNA(adenine(58)-N(1))-methyltransferasecatalyticsubunitTRMT61A	No
TXD12	TXNDC12	O95881	Thioredoxindomain-containingprotein12	0.105782
U2AF2	U2AF2	P26368	Splicing factor U2AF65kDa subunit	0.118868
UB2L3	UBE2L3	P68036	Ubiquitin-conjugating enzyme E2L3	2.24237
UBA6	UBA6	A0AVT1	Ubiquitin-like modifier-activating enzyme 6	0.549518
UBC9	UBE2I	P63279	SUMO-conjugating enzyme UBC9	0.132524
UBE2O	UBE2O	Q9C0C9	E2/E3hybrid ubiquitin-protein ligase UBE2O	0.180604
UBP11	USP11	P51784	Ubiquitin carboxyl-terminal hydrolase	N/A
UBQL2	UBQLN2	Q9UHD9	Ubiquilin-2	0.333142
UBQL4	UBQLN4	Q9NRR5	Ubiquilin-4	0.164199
UBR4	UBR4	Q5T4S7	E3 ubiquitin-protein ligase UBR4	0.644708
UGGG1	UGGT1	Q9NYU2	UDP-glucose:glycoproteinglucosyltransferase1	0.377143
VATG1	ATP6V1G1	O75348	V-type proton ATPase subunit G1	0.516269
VISL1	VSNL1	P62760	Visinin-like protein 1	0.378635
WDR5	WDR5	P61964	WDrepeat-containingprotein5	0.144413
XPO1	XPO1	O14980	Exportin-1	0.391819
XPO2	CSE1L	P55060	Exportin-2	0.262004
YBOX3	YBX3	P16989-2	Isoform2ofY-box-bindingprotein3	0.00407214
ZCHC3	ZCCHC3	Q9NUD5	Zinc finger CCHC domain-containing protein 3	N/A
ZFR	ZFR	Q96KR1	Zinc finger RNA-binding protein	0.127481
ZN207	ZNF207	O43670	BUB3-interacting and GLEBS motif-containing protein ZNF207	0.381182
ZYX	ZYX	Q15942	Zyxin	0.286421
KITH	TK1	P04183	Thymidine kinase, cytosolic	N/A
